# Supplementary figures and images for: Influence of annealing conditions on the structure and luminescence properties of KGd1−xEux(MoO4)2 (0 ≤ x ≤ 1)
Source: Royal Society of Chemistry journal article supplement (doi:10.1039/c9ce01244c), 2019-01-01

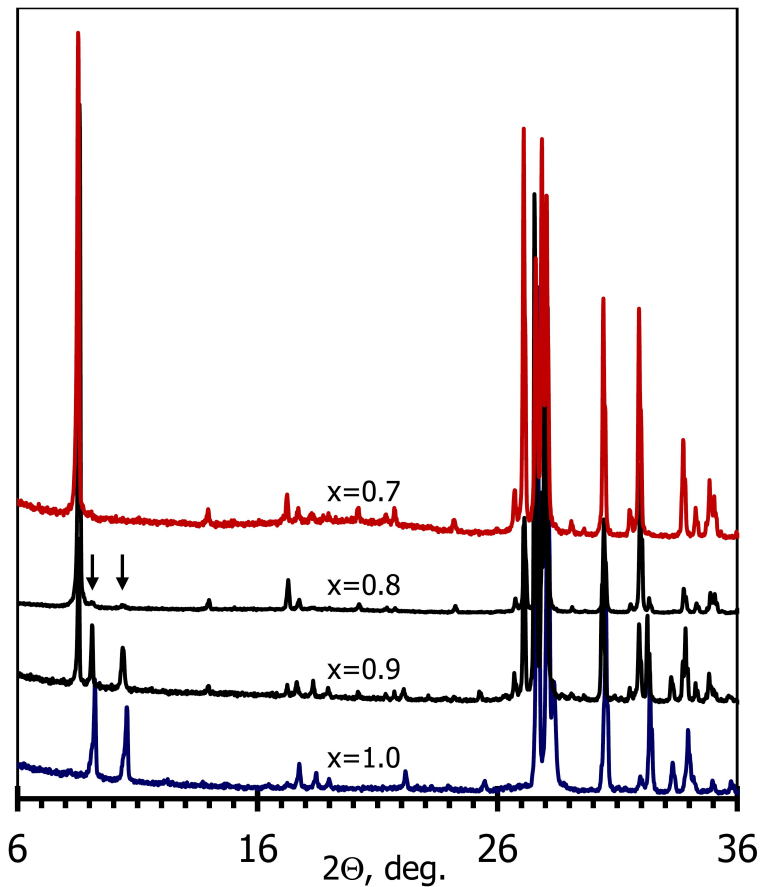

Supplement: c9ce01244c1.pdf [file c9ce01244c1.pdf]

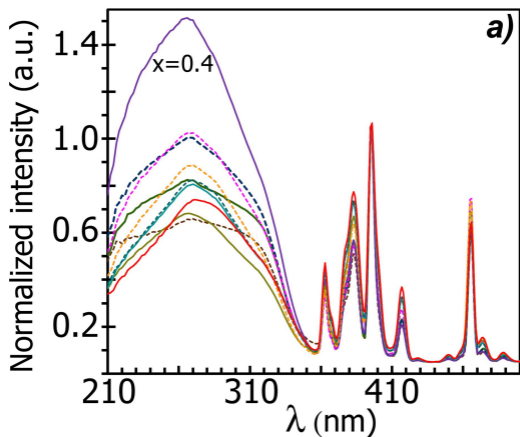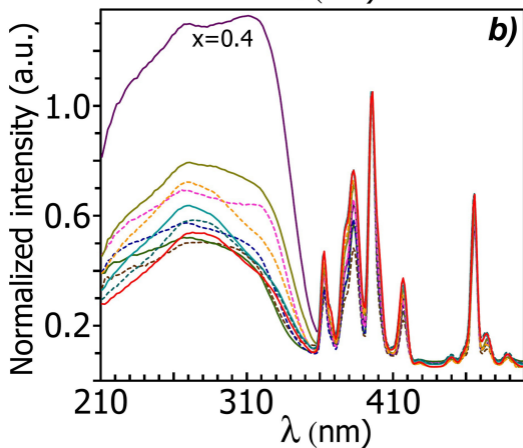

Supplement: c9ce01244c3.pdf [file c9ce01244c3.pdf]

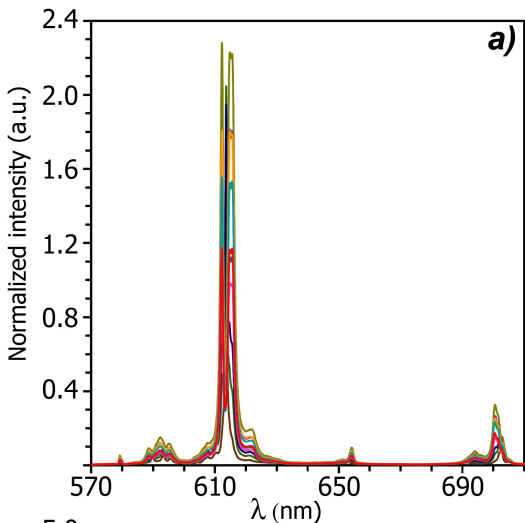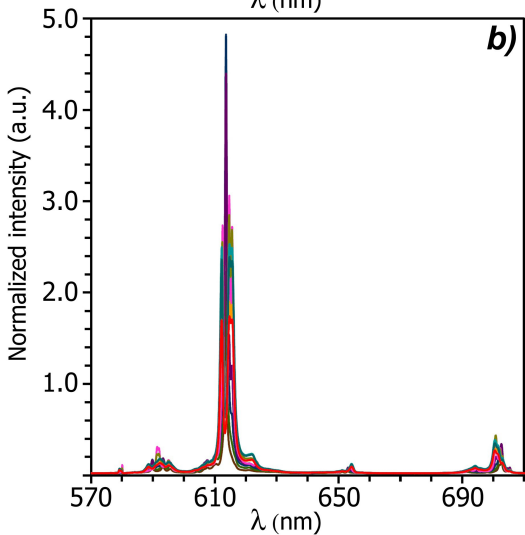

Supplement: c9ce01244c4.pdf [file c9ce01244c4.pdf]
